# Supplementary material for: Synthesis of self-standing mesoporous nanocrystalline titania–phosphorus oxide composite films
Source: Royal Society of Chemistry journal article supplement (doi:10.1039/b412396d), 2004-01-01
Supplement: b412396d.pdf [file b412396d.pdf]

# Synthesis of self-standing mesoporous nanocrystalline titania-phosphorus oxide composite films

Hui-suk Yun, Haoshen Zhou, Itaru Honma\*

National Institute of Advanced Industrial Science and Technology (AIST)

E-mail: i.homma@aist.go.jp

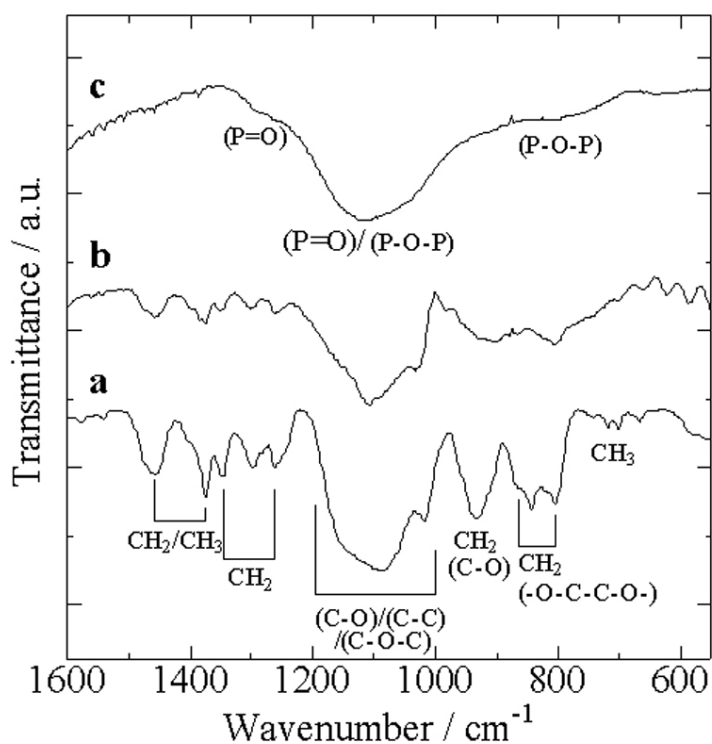

**Fig. S1.** FT-IR spectra obtained from pure P123 (a) and self-standing thick films of mesoporous TiO<sub>2</sub>-P<sub>2</sub>O<sub>5</sub> before (b) and after (c) calcination. Typical bands from the template (a) disappeared after calcination at 400°C (c), although some adsorption bands remained from the glass P<sub>2</sub>O<sub>5</sub> phase.

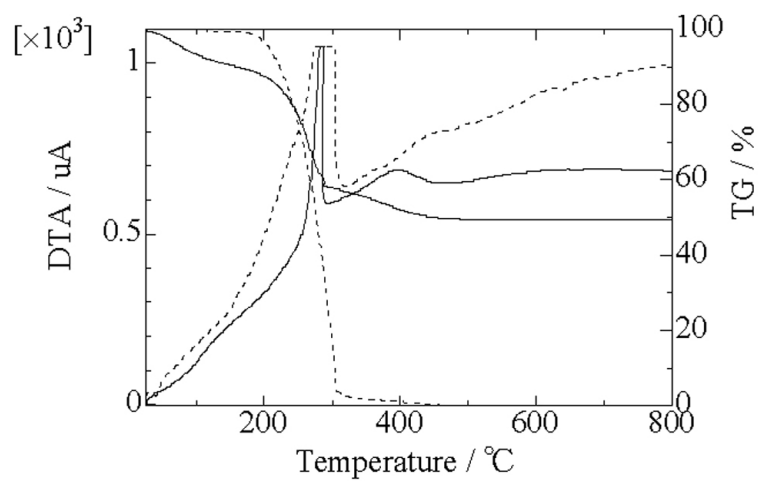

**Fig. S2.** TG-DTA trace of P123 (dashed line) and self-standing thick films of TiO<sub>2</sub>-P<sub>2</sub>O<sub>5</sub> (solid line). Almost all of the P123 could be removed by calcination at 400°C.

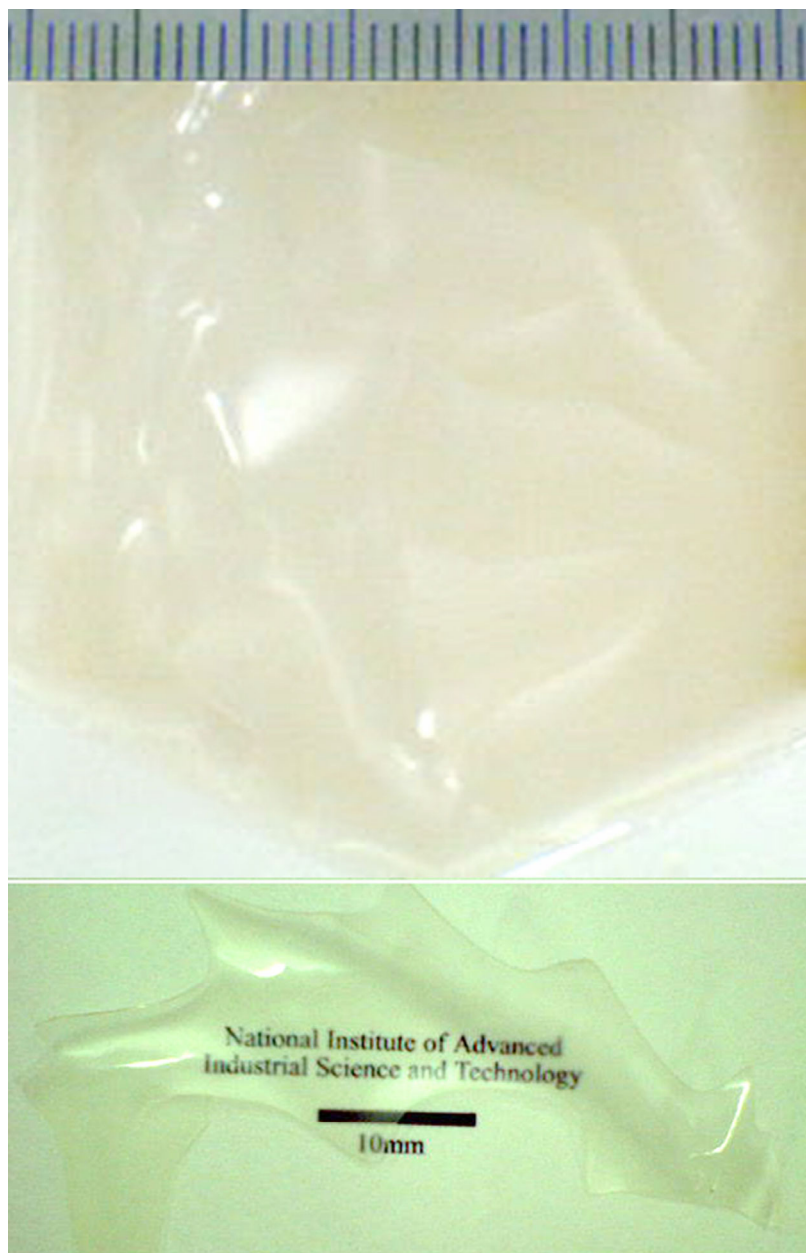

**Fig. S3.** Optical images of a self-standing 85- $\mu\text{m}$ -thick film of mesostructured  $\text{TiO}_2\text{-P}_2\text{O}_5$  after drying at  $70^\circ\text{C}$  in air for 20 h (EISA was performed at  $15^\circ\text{C}/80\%RH$  in air for 48 h).
